# Supplementary material for: Systematic review of the dry powder inhalers colistimethate sodium and tobramycin in cystic fibrosis
Source: PubMed Central journal article supplement — Eur Respir Rev. 2013 Dec;22(130):476–86. doi: 10.1183/09059180.00001513 (PMC9639188; doi:10.1183/09059180.00001513), 2013-12
Supplement: ERR_0015-2013_Disclosure_Brownlee.pdf [file ERR_0015-2013_Disclosure_Brownlee.pdf]

To view the full contents of this document, you need a later version of the PDF viewer. You can upgrade to the latest version of Adobe Reader from [www.adobe.com/products/acrobat/readstep2.html](http://www.adobe.com/products/acrobat/readstep2.html)

For further support, go to [www.adobe.com/support/products/acrreader.html](http://www.adobe.com/support/products/acrreader.html)
